# Supplementary material
Source: PubMed Central journal article supplement (PMC3048080)
Supplement: cc1001_0135SD1.pdf [file cc1001_0135SD1.pdf]

Supplemental Information for:

## **Trophinin-mediated cell adhesion induces apoptosis of human endometrial epithelial cells through PKC- $\delta$**

**Naoaki Tamura<sup>a</sup>, Kazuhiro Sugihara<sup>b</sup>, Tomoya O. Akama<sup>a</sup>, and Michiko N. Fukuda<sup>a\*</sup>**

<sup>a</sup>Tumor Microenvironment Program, Cancer Center, Sanford-Burnham Medical Research Institute, La Jolla, California 92037, USA; <sup>b</sup>Department of Obstetrics and Gynecology, Hamamatsu University School of Medicine, Handayama, Hamamatsu City, Shizuoka, Japan.

\*To whom the correspondence should be addressed. E-mail: [michiko@sanfordburnham.org](mailto:michiko@sanfordburnham.org).

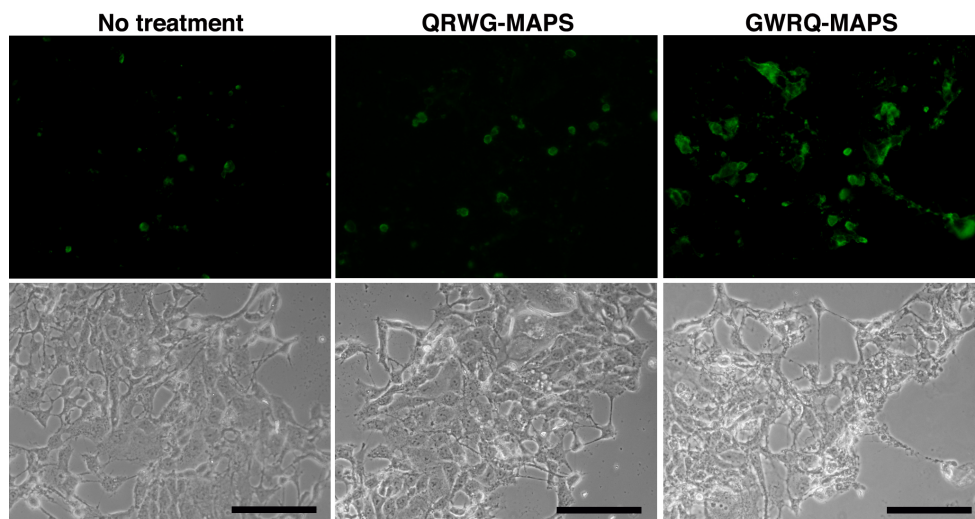

**Fig. S1.** Apoptosis assay using immunofluorescence microscopy for cell surface Annexin V, 6 hours after adding PBS containing 10  $\mu\text{g/ml}$  each of control-MAPS or GWRQ-MAPS peptides. Note that the number of cells showing surface Annexin V staining increased in the presence of GWRQ-MAPS. Lower panels show corresponding phase-contrast images. Scale bars indicate 100  $\mu\text{m}$ .

Table S1. Quantitative analysis of phospho-specific multiple Western blots shown in Fig. S5.

|                                                                                           |                              | 1.3-CTL Norm CPM | 1.3-GWR2 Norm CPM | 1.3-CTL % | 1.3-GWR2 % |
|-------------------------------------------------------------------------------------------|------------------------------|------------------|-------------------|-----------|------------|
| Adenovirus gamma 1 (AD1) [2726]                                                           | Adenovirus 1 Lane 2          | 1632             | 1076              | Control   | -41%       |
| Adenovirus gamma 2 (AD2) [2692]                                                           | Adenovirus 1 Lane 2          | 1640             | 2533              | Control   | 56%        |
| B23 (nucleophosmin, nucleolin, nucleolar protein N23B) [54]                               | B23 (NP1) Lane 19            | 182              | 182               | Control   | 12%        |
| cAMP response element binding protein 1 [2132]                                            | CREB1 Lane 20                | 883              | 1118              | Control   | 26%        |
| Cyclin-dependent protein-enzyme kinase 12 [2115] (24)                                     | CDK12 (24) Lane 2            |                  |                   |           |            |
| Cyclin-dependent protein-enzyme kinase 13 [2115] (27)                                     | CDK13 (27) Lane 2            | 3034             | 4132              | Control   | 26%        |
| Double-stranded RNA-dependent protein-enzyme kinase [2451] (85)                           | PKR1 (85) Lane 16            | 274              | 194               | Control   | -30%       |
| Double-stranded RNA-dependent protein-enzyme kinase [2451] (73)                           | PKR1 (73) Lane 16            | 712              | 368               | Control   | -48%       |
| Endothelial regulated protein-enzyme kinase 1 (p44 MAP kinase) [1220-V204]                | ERK1 Lane 8                  | 1245             | 761               | Control   | -39%       |
| Endothelial regulated protein-enzyme kinase 2 (p42 MAP kinase) [1220-V187]                | ERK2 Lane 8                  | 6884             | 5929              | Control   | -12%       |
| Glycogen synthase-enzyme kinase 3 alpha [221]                                             | GSK3a Lane 15                | 900              | 624               | Control   | -31%       |
| Glycogen synthase-enzyme kinase 3 alpha [221] (44)                                        | GSK3a (44) Lane 17           | 1878             | 1427              | Control   | -24%       |
| Glycogen synthase-enzyme kinase 3 alpha [221] (46)                                        | GSK3a (46) Lane 17           |                  |                   |           |            |
| Glycogen synthase-enzyme kinase 3 beta [258]                                              | GSK3b Lane 15                | 912              | 785               | Control   | -13%       |
| Glycogen synthase-enzyme kinase 3 beta [258] (24)                                         | GSK3b (24) Lane 17           |                  |                   |           |            |
| Glycogen synthase-enzyme kinase 3 beta [258] (26)                                         | GSK3b (26) Lane 17           | 4872             | 2798              | Control   | -43%       |
| Jun N-terminus protein-enzyme kinase (stress-activated protein kinase) [1133-V182] (37)   | JNK (37) Lane 6              | 1123             | 1548              | Control   | 38%        |
| Jun N-terminus protein-enzyme kinase (stress-activated protein kinase) [1133-V182] (36)   | JNK (36) Lane 6              |                  |                   |           |            |
| Jun N-terminus protein-enzyme kinase (stress-activated protein kinase) [1133-V182] (44)   | JNK (44) Lane 6              | 408              | 473               | Control   | 11%        |
| Jun N-terminus protein-enzyme kinase (stress-activated protein kinase) [1133-V182] (46)   | JNK (46) Lane 6              | 905              | 923               | Control   | 5%         |
| Jun proto-oncogene-encoded AP1 transcription factor [372] (37)                            | Jun (37) Lane 11             |                  |                   |           |            |
| Jun proto-oncogene-encoded AP1 transcription factor [372] (29)                            | Jun (29) Lane 11             | 131              | 126               | Control   | -4%        |
| Jun proto-oncogene-encoded AP1 transcription factor [372] (41)                            | Jun (41) Lane 11             | 373              | 356               | Control   | -5%        |
| Jun proto-oncogene-encoded AP1 transcription factor [372] (43)                            | Jun (43) Lane 11             | 182              | 143               | Control   | -21%       |
| MAPK/ERK protein-enzyme kinase 1.2 (MAPK12) [2118-S222]                                   | MEK12 (MAP2K12) Lane 19      | 1352             | 1027              | Control   | -26%       |
| MAPK/ERK protein-enzyme kinase 3.8 (MAPK38) [2185-S207]                                   | MEK38 (MAP2K38) Lane 7       |                  |                   |           |            |
| Mitogen & stress-activated protein-enzyme kinase 1 [3372] (86)                            | MS1 (86) Lane 15             | 133              | 111               | Control   | -17%       |
| Mitogen & stress-activated protein-enzyme kinase 1 [3372] (74)                            | MS1 (74) Lane 15             | 292              | 155               | Control   | -47%       |
| Mitogen-activated protein-enzyme kinase $\beta$ 2B alpha [1133-V182] (36)                 | $\beta$ 2B MAPK (36) Lane 18 | 437              | 481               | Control   | 5%         |
| Mitogen-activated protein-enzyme kinase $\beta$ 2B alpha [1133-V182] (45)                 | $\beta$ 2B MAPK (45) Lane 18 | 382              | 108               | Control   | -49%       |
| N-methyl-D-aspartate (NMDA) glutamate receptor 1 subunit alpha [2698]                     | NR1 Lane 3                   | 324              | 193               | Control   | -40%       |
| p70 (ribosomal protein-enzyme S6 kinase alpha) [7336]                                     | S6K1 (p70 S6K1) Lane 8       | 377              | 458               | Control   | 21%        |
| p85 (ribosomal protein-enzyme S6 kinase alpha) [7336]                                     | S6K1 (p85 S6K1) Lane 8       | 344              | 415               | Control   | 21%        |
| Protein-enzyme kinase B alpha [2472]                                                      | PKB1 (Akt1) Lane 14          | 6035             | 5903              | Control   | 43%        |
| Protein-enzyme kinase B alpha [2508]                                                      | PKB1 (Akt1) Lane 13          | 3052             | 3758              | Control   | 4%         |
| Protein-enzyme kinase C alpha [2487]                                                      | PKC1a Lane 5                 | 8736             | 8899              | Control   | 3%         |
| Protein-enzyme kinase C alpha/beta2 [1768-7641]                                           | PKC1a2 Lane 7                | 1666             | 1704              | Control   | 2%         |
| Protein-enzyme kinase C delta [2722]                                                      | PKC1d Lane 13                | 189              | 74                | Control   | -61%       |
| Protein-enzyme kinase C epsilon [2722]                                                    | PKC1e Lane 5                 |                  |                   |           |            |
| Raf1 proto-oncogene-encoded protein-enzyme kinase [2326] (83)                             | Raf1 (83) Lane 12            | 333              | 288               | Control   | -13%       |
| Raf1 proto-oncogene-encoded protein-enzyme kinase [2326] (83)                             | Raf1 (83) Lane 12            | 152              | 158               | Control   | 4%         |
| Retrotransposon associated protein 1 [2176]                                               | RA1 Lane 18                  | 644              | 383               | Control   | -41%       |
| Retrotransposon associated protein 1 [2687-S811]                                          | RA1 Lane 20                  |                  |                   |           |            |
| Ribosomal S6 protein-enzyme kinase 1.3 [2326-S263] [2326-S263] (79)                       | RSK13 (79) Lane 6            |                  |                   |           |            |
| Ribosomal S6 protein-enzyme kinase 1.3 [2326-S263] [2326-S263] (87)                       | RSK13 (87) Lane 6            |                  |                   |           |            |
| Signal transducer and activator of transcription 1 [2710] (78)                            | STAT1 (78) Lane 12           | 275              | 143               | Control   | -48%       |
| Signal transducer and activator of transcription 1 [2710] (87)                            | STAT1 (87) Lane 12           |                  |                   |           |            |
| Signal transducer and activator of transcription 3 [2712]                                 | STAT3 Lane 10                | 2625             | 2244              | Control   | -15%       |
| Signal transducer and activator of transcription-5A [2694]                                | STAT5A Lane 4                | 77               | 87                | Control   | 12%        |
| SMA- and myosin segment disintegrating homologue 1.55 [5463-S463] [5463-S463] [5463-S463] | Smad155 Lane 9               | 376              | 351               | Control   | -7%        |
| Src proto-oncogene-encoded protein-enzyme kinase [2426] (44)                              | Src (44) Lane 5              |                  |                   |           |            |
| Src proto-oncogene-encoded protein-enzyme kinase [2426] (46)                              | Src (46) Lane 5              |                  |                   |           |            |
| Src proto-oncogene-encoded protein-enzyme kinase [2426] (44)                              | Src (44) Lane 2              | 7434             | 9318              | Control   | 25%        |
| Src proto-oncogene-encoded protein-enzyme kinase [2426] (46)                              | Src (46) Lane 2              |                  |                   |           |            |

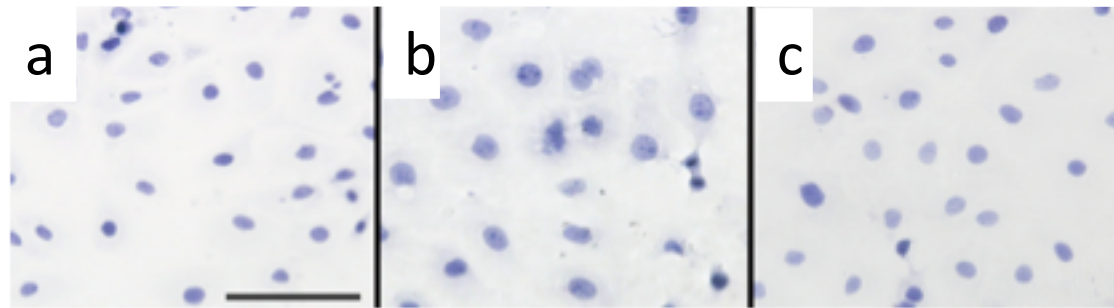

**Fig. S2.** TUNEL assay of A431 cells cultured in medium containing none (a), control-MAPS (b), or GWRQ-MAPS (c) at 37 °C for 20 hours.

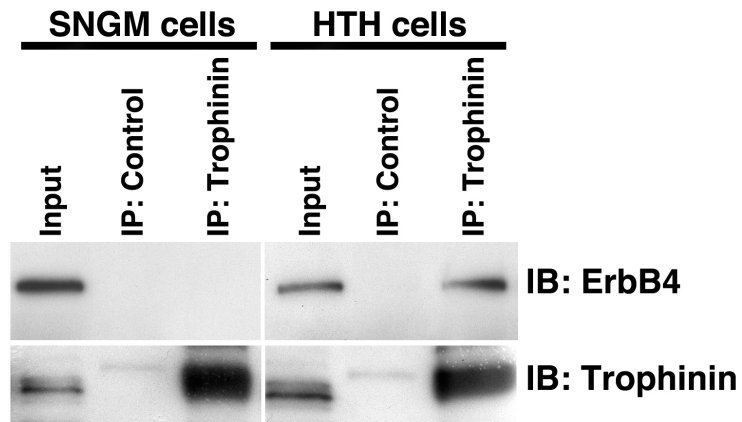

**Fig. S3.** Association of trophinin and ErbB4 in SNG-M and HT-H cells. Western blot analysis of ErbB4 in SNG-M cells or HT-H cells. Cell lysates from each line were subjected to co-immunoprecipitation with control antibody or with anti-trophinin antibody. Immunoprecipitates were analyzed by Western blot using anti-ErbB4 antibody (upper panels). After stripping the blots, the same filters were reacted with an anti-trophinin antibody (lower panels).

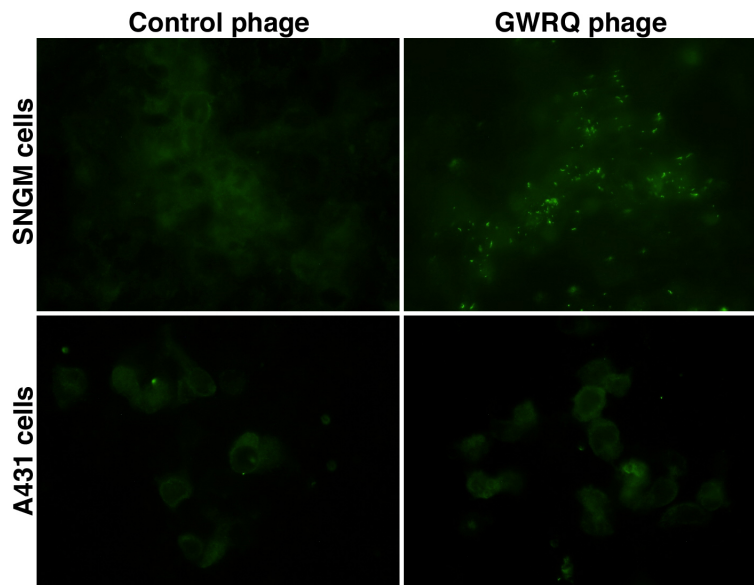

**Fig. S4.** Immunofluorescence microscopy analysis of SNG-M cells or control A431 cells with an anti-phage antibody. Cells were bound with control phage without insert or with GWRQ peptide-displaying phage. Cells were then reacted with anti-fd phage antibody followed by Alexa488-conjugated anti-rabbit IgG antibody.

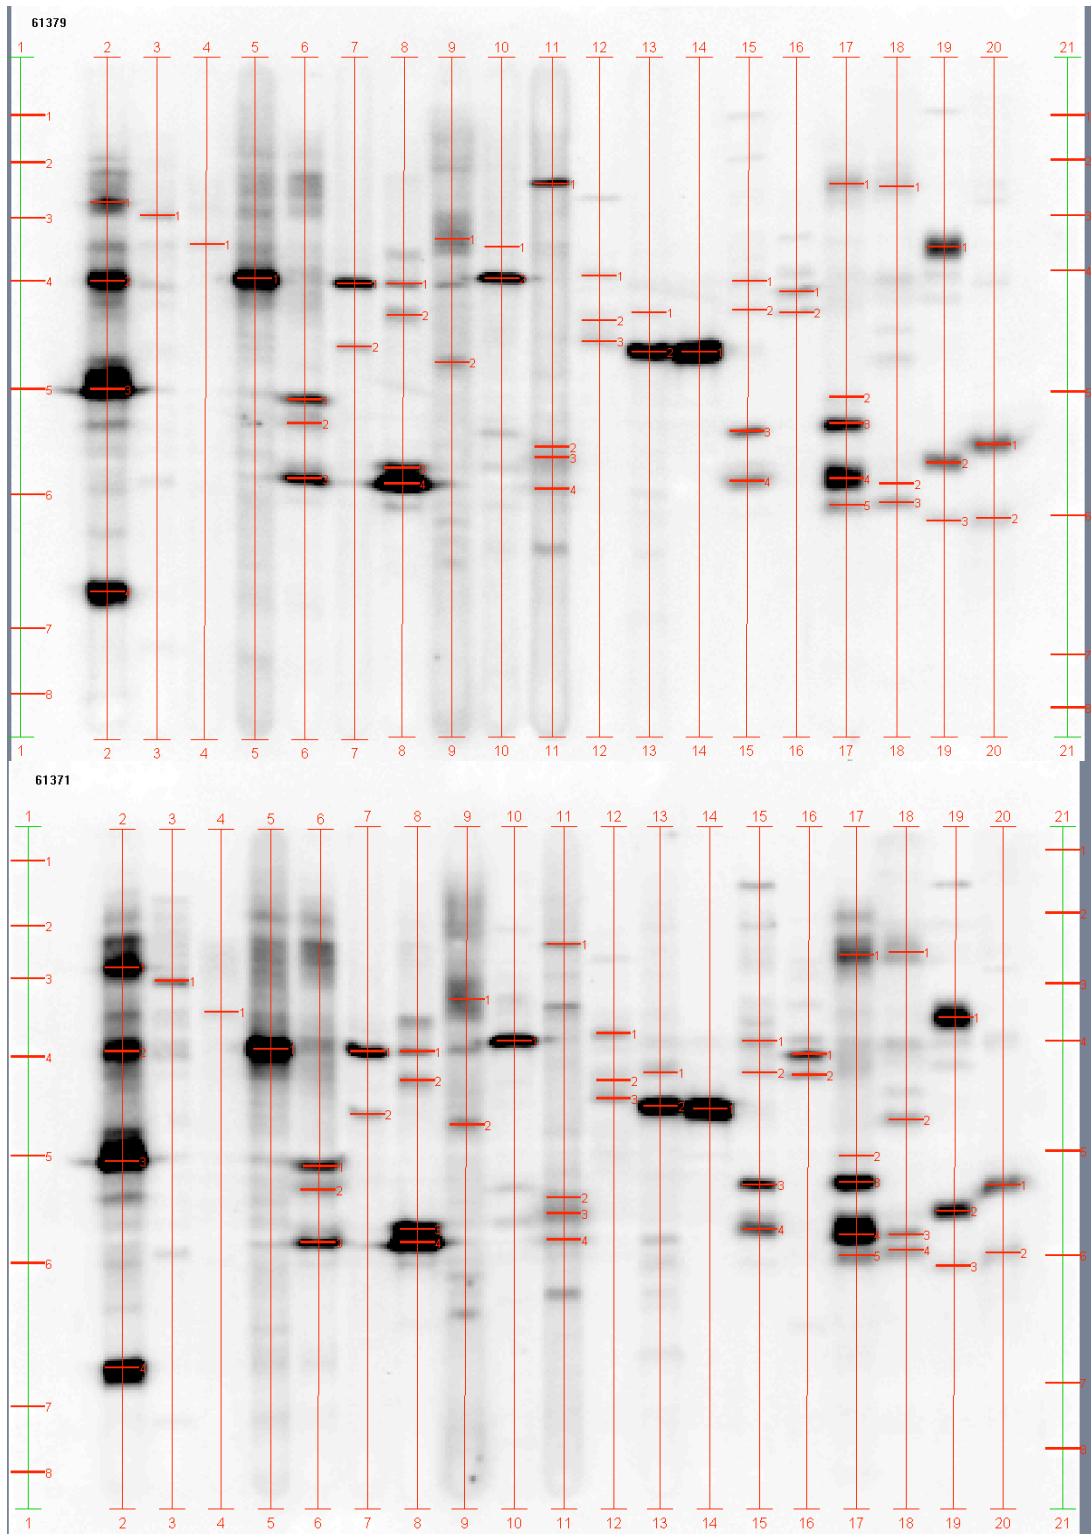

**Fig. S5.** Western blot of SNG-M cells lysates each prepared from SNG-M cells treated with (up) or without (low) GWRQ-MAPS at 37C for 30 min. Each lane was reacted with phosphospecific antibodies for phosphorylated proteins listed in Table S1.

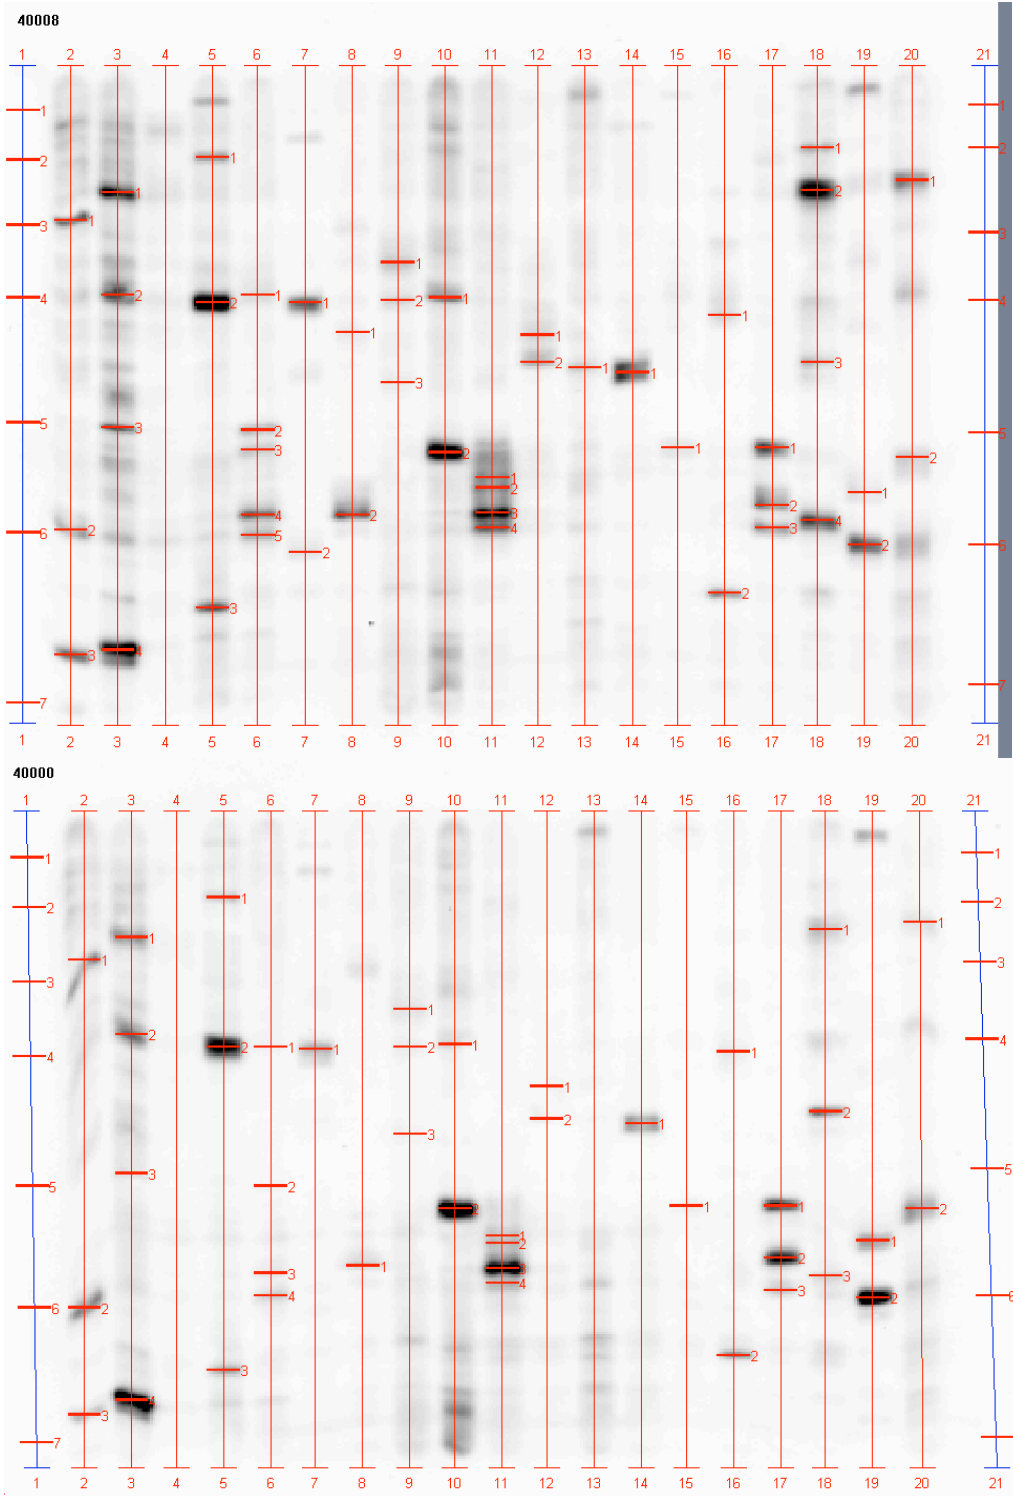

**Fig. S6.** Western blot of cell lysates, each prepared from HT-H cells treated with (up) or without (low) GWRQ-MAPS peptide at 37 C for 30 min. Each lane was reacted with phosphospecific antibodies for the phosphorylated proteins listed in Table S2.



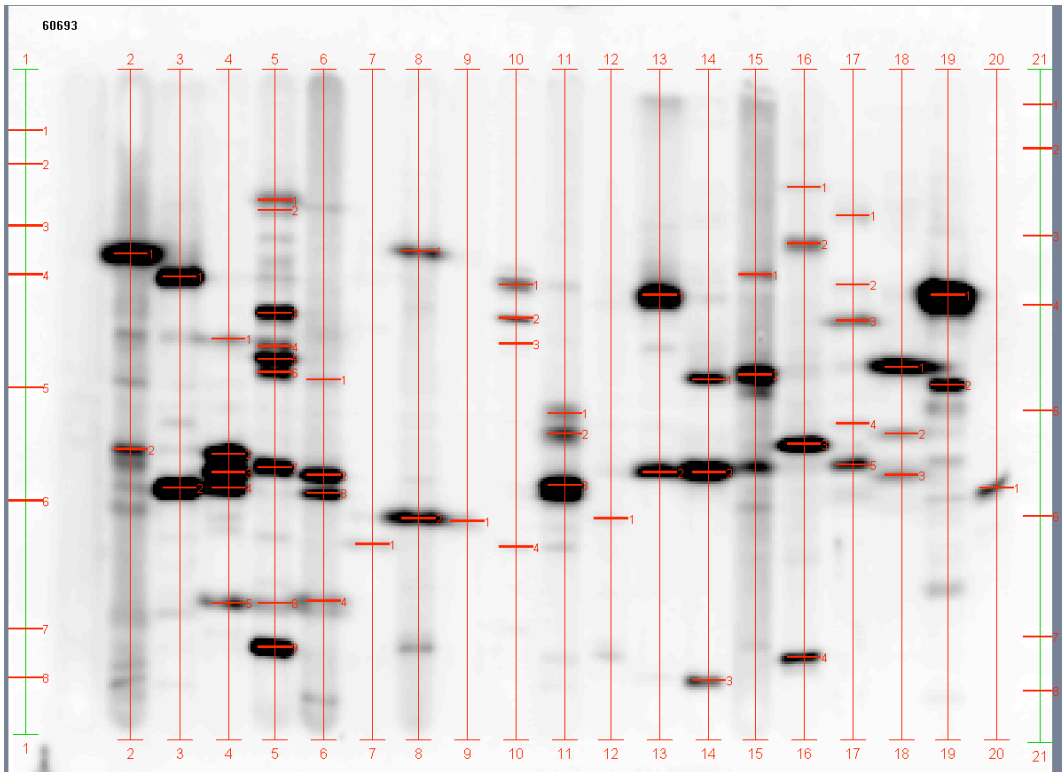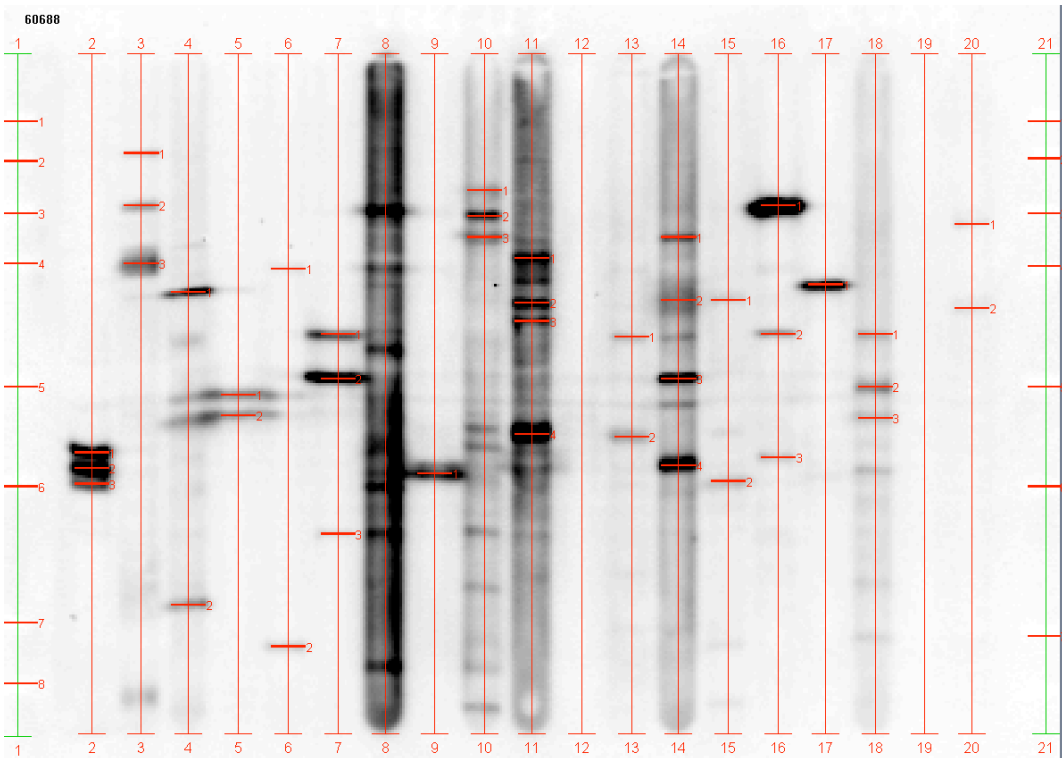

**Fig. S7.** Multiple Western blots for protein kinases expressed in SNG-M cells treated with (up) or without (low) GWRQ-MAPS at 37C for 30 min. Each lane was reacted with specific antibodies listed in Table S3.

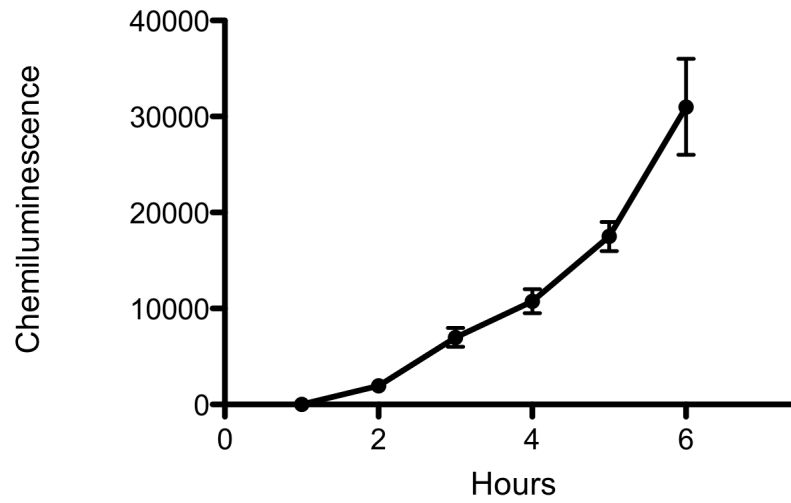

**Fig. S8.** Caspase 3/7 activity of SNG-M cells cultured in medium containing 20  $\mu\text{g}/\text{mL}$  GWRQ-MAPS peptide.

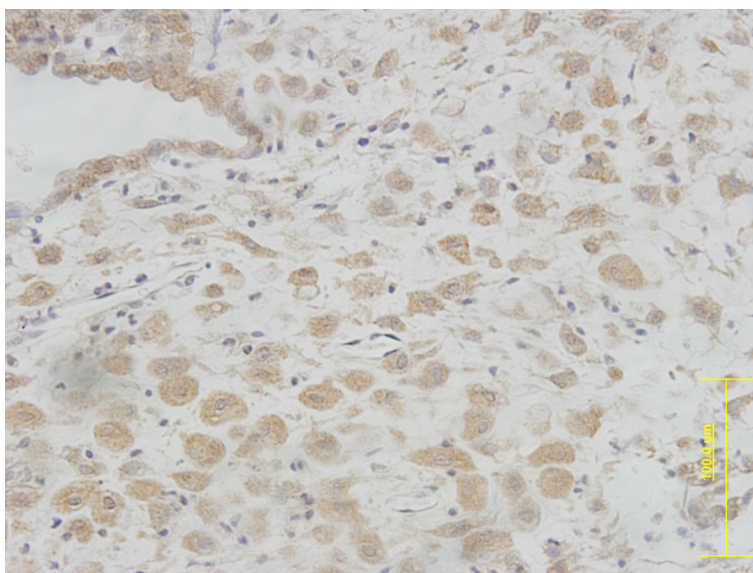

**Fig. S9.** Immunohistochemistry of human placental tissue section from the first trimester pregnancy by anti-trophinin antibody (clone 3-11, mouse IgM).

Table S1. Quantitative analysis of phospho-specific multiple Western blots of SNG-M cells shown in Fig. S5.

|                                                                                                | 1.3-CTL Norm CPM | 1.3-GWRQ Norm CPM | 1.3-CTL % | 1.3-GWRQ % |
|------------------------------------------------------------------------------------------------|------------------|-------------------|-----------|------------|
| Adducin alpha (ADD1) [S726]                                                                    |                  |                   |           |            |
| Adducin gamma (ADD3) [S693]                                                                    |                  |                   |           |            |
| B23 (nucleophosmin, numatrin, nucleolar protein NO38) [S4]                                     |                  |                   |           |            |
| cAMP response element binding protein 1 [S133]                                                 |                  |                   |           |            |
| Cyclin-dependent protein-serine kinase 1/2 [Y15] (24)                                          |                  |                   |           |            |
| Cyclin-dependent protein-serine kinase 1/2 [Y15] (27)                                          |                  |                   |           |            |
| Double-stranded RNA-dependent protein-serine kinase [T451] (65)                                |                  |                   |           |            |
| Double-stranded RNA-dependent protein-serine kinase [T451] (73)                                |                  |                   |           |            |
| Extracellular regulated protein-serine kinase 1 (p44 MAP kinase) [T202+Y204]                   |                  |                   |           |            |
| Extracellular regulated protein-serine kinase 2 (p42 MAP kinase) [T185+Y187]                   |                  |                   |           |            |
| Glycogen synthase-serine kinase 3 alpha [S21]                                                  |                  |                   |           |            |
| Glycogen synthase-serine kinase 3 alpha [Y279] (44)                                            |                  |                   |           |            |
| Glycogen synthase-serine kinase 3 alpha [Y279] (49)                                            |                  |                   |           |            |
| Glycogen synthase-serine kinase 3 beta [S9]                                                    |                  |                   |           |            |
| Glycogen synthase-serine kinase 3 beta [Y216] (34)                                             |                  |                   |           |            |
| Glycogen synthase-serine kinase 3 beta [Y216] (39)                                             |                  |                   |           |            |
| Jun N-terminus protein-serine kinase (stress-activated protein kinase (SAPK)) [T183+Y185] (37) |                  |                   |           |            |
| Jun N-terminus protein-serine kinase (stress-activated protein kinase (SAPK)) [T183+Y185] (38) |                  |                   |           |            |
| Jun N-terminus protein-serine kinase (stress-activated protein kinase (SAPK)) [T183+Y185] (44) |                  |                   |           |            |
| Jun N-terminus protein-serine kinase (stress-activated protein kinase (SAPK)) [T183+Y185] (46) |                  |                   |           |            |
| Jun proto-oncogene-encoded AP1 transcription factor [S73] (37)                                 |                  |                   |           |            |
| Jun proto-oncogene-encoded AP1 transcription factor [S73] (39)                                 |                  |                   |           |            |
| Jun proto-oncogene-encoded AP1 transcription factor [S73] (41)                                 |                  |                   |           |            |
| Jun proto-oncogene-encoded AP1 transcription factor [S73] (43)                                 |                  |                   |           |            |
| MAPK/ERK protein-serine kinase 1/2 (MKK1/2) [S218+S222]                                        |                  |                   |           |            |
| MAPK/ERK protein-serine kinase 3/6 (MKK3/6) [S189/S207]                                        |                  |                   |           |            |
| Mitogen & stress-activated protein-serine kinase 1 [S376] (66)                                 |                  |                   |           |            |
| Mitogen & stress-activated protein-serine kinase 1 [S376] (74)                                 |                  |                   |           |            |
| Mitogen-activated protein-serine kinase p38 alpha [T180+Y182] (36)                             |                  |                   |           |            |
| Mitogen-activated protein-serine kinase p38 alpha [T180+Y182] (40)                             |                  |                   |           |            |
| N-methyl-D-aspartate (NMDA) glutamate receptor 1 subunit zeta [S896]                           |                  |                   |           |            |
| p70 ribosomal protein-serine S6 kinase alpha [T389]                                            |                  |                   |           |            |
| p85 ribosomal protein-serine S6 kinase alpha [T389]                                            |                  |                   |           |            |
| Protein-serine kinase B alpha [S473]                                                           |                  |                   |           |            |
| Protein-serine kinase B alpha [T308]                                                           |                  |                   |           |            |
| Protein-serine kinase C alpha [S657]                                                           |                  |                   |           |            |
| Protein-serine kinase C alpha/beta 2 [T638/T641]                                               |                  |                   |           |            |
| Protein-serine kinase C delta [T507]                                                           |                  |                   |           |            |
| Protein-serine kinase C epsilon [S729]                                                         |                  |                   |           |            |
| Raf1 proto-oncogene-encoded protein-serine kinase [S259] (60)                                  |                  |                   |           |            |
| Raf1 proto-oncogene-encoded protein-serine kinase [S259] (63)                                  |                  |                   |           |            |
| Retinoblastoma-associated protein 1 [S780]                                                     |                  |                   |           |            |
| Retinoblastoma-associated protein 1 [S807+S811]                                                |                  |                   |           |            |
| Ribosomal S6 protein-serine kinase 1/3 [T359+S363/T356+S360] (79)                              |                  |                   |           |            |
| Ribosomal S6 protein-serine kinase 1/3 [T359+S363/T356+S360] (87)                              |                  |                   |           |            |
| Signal transducer and activator of transcription 1 [Y701] (78)                                 |                  |                   |           |            |
| Signal transducer and activator of transcription 1 [Y701] (87)                                 |                  |                   |           |            |
| Signal transducer and activator of transcription 3 [S727]                                      |                  |                   |           |            |
| Signal transducer and activator of transcription 5A [Y694]                                     |                  |                   |           |            |
| SMA- and mothers against decapentaplegic homologs 1/5/9 [S463+S465/S463+S465/S465+S467]        |                  |                   |           |            |
| Src proto-oncogene-encoded protein-tyrosine kinase [Y418] (44)                                 |                  |                   |           |            |
| Src proto-oncogene-encoded protein-tyrosine kinase [Y418] (46)                                 |                  |                   |           |            |
| Src proto-oncogene-encoded protein-tyrosine kinase [Y529] (44)                                 |                  |                   |           |            |
| Src proto-oncogene-encoded protein-tyrosine kinase [Y529] (46)                                 |                  |                   |           |            |
| Adducin a Lane 2                                                                               | 1832             | 1076              | Control   | -41%       |
| Adducin g Lane 2                                                                               | 1640             | 2593              | Control   | 58%        |
| B23 (NPM) Lane 19                                                                              | 162              | 182               | Control   | 12%        |
| CREB1 Lane 20                                                                                  | 883              | 1116              | Control   | 26%        |
| CDK1/2 (24) Lane 2                                                                             |                  |                   |           |            |
| CDK1/2 (27) Lane 2                                                                             | 3634             | 4592              | Control   | 26%        |
| PKR1 (65) Lane 16                                                                              | 274              | 184               | Control   | -33%       |
| PKR1 (73) Lane 16                                                                              | 702              | 366               | Control   | -48%       |
| Erk1 Lane 8                                                                                    | 1245             | 761               | Control   | -39%       |
| Erk2 Lane 8                                                                                    | 6684             | 5909              | Control   | -12%       |
| GSK3a Lane 15                                                                                  | 900              | 624               | Control   | -31%       |
| GSK3a (44) Lane 17                                                                             | 1878             | 1427              | Control   | -24%       |
| GSK3a (49) Lane 17                                                                             |                  |                   |           |            |
| GSK3b Lane 15                                                                                  | 992              | 785               | Control   | -21%       |
| GSK3b (34) Lane 17                                                                             |                  |                   |           |            |
| GSK3b (39) Lane 17                                                                             | 4672             | 2796              | Control   | -40%       |
| JNK (37) Lane 6                                                                                | 1123             | 1546              | Control   | 38%        |
| JNK (38) Lane 6                                                                                |                  |                   |           |            |
| JNK (44) Lane 6                                                                                | 426              | 473               | Control   | 11%        |
| JNK (46) Lane 6                                                                                | 905              | 953               | Control   | 5%         |
| Jun (37) Lane 11                                                                               |                  |                   |           |            |
| Jun (39) Lane 11                                                                               | 131              | 126               | Control   | -4%        |
| Jun (41) Lane 11                                                                               | 373              | 356               | Control   | -5%        |
| Jun (43) Lane 11                                                                               | 182              | 143               | Control   | -21%       |
| MEK1/2 (MAP2K1/2) Lane 19                                                                      | 1352             | 1007              | Control   | -26%       |
| MEK3/6 (MAP2K3/6) Lane 7                                                                       |                  |                   |           |            |
| Msk1 (66) Lane 15                                                                              | 133              | 111               | Control   | -17%       |
| Msk1 (74) Lane 15                                                                              | 292              | 155               | Control   | -47%       |
| p38a MAPK (36) Lane 18                                                                         | 437              | 461               | Control   | 5%         |
| p38a MAPK (40) Lane 18                                                                         | 352              | 108               | Control   | -69%       |
| NR1 Lane 3                                                                                     | 324              | 193               | Control   | -40%       |
| S6Ka (p70 S6Ka) Lane 8                                                                         | 377              | 458               | Control   | 21%        |
| S6Ka (p85 S6Ka) Lane 8                                                                         | 344              | 415               | Control   | 21%        |
| PKBa (Akt1) Lane 14                                                                            | 6636             | 9491              | Control   | 43%        |
| PKBa (Akt1) Lane 13                                                                            | 3652             | 3798              | Control   | 4%         |
| PKCa Lane 5                                                                                    | 6736             | 6909              | Control   | 3%         |
| PKCa/b2 Lane 7                                                                                 | 1666             | 1704              | Control   | 2%         |
| PKCd Lane 13                                                                                   | 189              | 74                | Control   | -61%       |
| PKCe Lane 9                                                                                    |                  |                   |           |            |
| Raf1 (60) Lane 12                                                                              | 333              | 299               | Control   | -10%       |
| Raf1 (63) Lane 12                                                                              | 152              | 158               | Control   | 4%         |
| Rb Lane 18                                                                                     | 644              | 383               | Control   | -41%       |
| Rb Lane 20                                                                                     |                  |                   |           |            |
| RSK1/3 (79) Lane 6                                                                             |                  |                   |           |            |
| RSK1/3 (87) Lane 6                                                                             |                  |                   |           |            |
| STAT1 (78) Lane 12                                                                             | 275              | 143               | Control   | -48%       |
| STAT1 (87) Lane 12                                                                             |                  |                   |           |            |
| STAT3 Lane 10                                                                                  | 2625             | 2244              | Control   | -15%       |
| STAT5A Lane 4                                                                                  | 77               | 87                | Control   | 13%        |
| Smad1/5/9 Lane 9                                                                               | 376              | 351               | Control   | -7%        |
| Src (44) Lane 5                                                                                |                  |                   |           |            |
| Src (46) Lane 5                                                                                |                  |                   |           |            |
| Src (44) Lane 2                                                                                | 7434             | 9316              | Control   | 25%        |
| Src (46) Lane 2                                                                                |                  |                   |           |            |

Table S2. Quantitative analysis of phospho-specific multiple Western blots of HT-H cells shown in Fig. S6

|                                                                                                | pep- Norm CPM | pep+ Norm CPM | pep- %  | pep+ % |
|------------------------------------------------------------------------------------------------|---------------|---------------|---------|--------|
| Adducin alpha (ADD1) [S726]                                                                    |               |               |         |        |
| Adducin gamma (ADD3) [S693]                                                                    |               |               |         |        |
| B23 (nucleophosmin, numatrin, nucleolar protein NO38) [S4]                                     |               |               |         |        |
| cAMP response element binding protein 1 [S133]                                                 |               |               |         |        |
| Cyclin-dependent protein-serine kinase 1/2 [Y15] (24)                                          |               |               |         |        |
| Cyclin-dependent protein-serine kinase 1/2 [Y15] (27)                                          |               |               |         |        |
| Double-stranded RNA-dependent protein-serine kinase [T451] (65)                                |               |               |         |        |
| Double-stranded RNA-dependent protein-serine kinase [T451] (73)                                |               |               |         |        |
| Extracellular regulated protein-serine kinase 1 (p44 MAP kinase) [T202+Y204]                   |               |               |         |        |
| Extracellular regulated protein-serine kinase 2 (p42 MAP kinase) [T185+Y187]                   |               |               |         |        |
| Glycogen synthase-serine kinase 3 alpha [S21]                                                  |               |               |         |        |
| Glycogen synthase-serine kinase 3 alpha [Y279] (44)                                            |               |               |         |        |
| Glycogen synthase-serine kinase 3 alpha [Y279] (49)                                            |               |               |         |        |
| Glycogen synthase-serine kinase 3 beta [S9]                                                    |               |               |         |        |
| Glycogen synthase-serine kinase 3 beta [Y216] (34)                                             |               |               |         |        |
| Glycogen synthase-serine kinase 3 beta [Y216] (39)                                             |               |               |         |        |
| Jun N-terminus protein-serine kinase (stress-activated protein kinase (SAPK)) [T183/Y185] (37) |               |               |         |        |
| Jun N-terminus protein-serine kinase (stress-activated protein kinase (SAPK)) [T183/Y185] (38) |               |               |         |        |
| Jun N-terminus protein-serine kinase (stress-activated protein kinase (SAPK)) [T183/Y185] (44) |               |               |         |        |
| Jun N-terminus protein-serine kinase (stress-activated protein kinase (SAPK)) [T183/Y185] (46) |               |               |         |        |
| Jun proto-oncogene-encoded AP1 transcription factor [S73] (37)                                 |               |               |         |        |
| Jun proto-oncogene-encoded AP1 transcription factor [S73] (39)                                 |               |               |         |        |
| Jun proto-oncogene-encoded AP1 transcription factor [S73] (41)                                 |               |               |         |        |
| Jun proto-oncogene-encoded AP1 transcription factor [S73] (43)                                 |               |               |         |        |
| MAP kinase protein-serine kinase 3/6 (MKK3/6) [S189/S207]                                      |               |               |         |        |
| MAP kinase protein-serine kinase 6 (MKK6) [S207]                                               |               |               |         |        |
| MAPK/ERK protein-serine kinase 1/2 (MKK1/2) [S217/S221]                                        |               |               |         |        |
| Mitogen & stress-activated protein-serine kinase 1 [S376] (66)                                 |               |               |         |        |
| Mitogen & stress-activated protein-serine kinase 1 [S376] (74)                                 |               |               |         |        |
| Mitogen-activated protein-serine kinase p38 alpha [T180+Y182] (36)                             |               |               |         |        |
| Mitogen-activated protein-serine kinase p38 alpha [T180+Y182] (40)                             |               |               |         |        |
| N-methyl-D-aspartate (NMDA) glutamate receptor 1 subunit zeta [S896]                           |               |               |         |        |
| p70 ribosomal protein-serine S6 kinase alpha [T389]                                            |               |               |         |        |
| p85 ribosomal protein-serine S6 kinase 2 [T412]                                                |               |               |         |        |
| Protein-serine kinase B alpha (Akt1) [S473]                                                    |               |               |         |        |
| Protein-serine kinase B alpha (Akt1) [T308]                                                    |               |               |         |        |
| Protein-serine kinase C alpha [S657]                                                           |               |               |         |        |
| Protein-serine kinase C alpha/beta 2 [T638/T641]                                               |               |               |         |        |
| Protein-serine kinase C delta [T507]                                                           |               |               |         |        |
| Protein-serine kinase C epsilon [S729]                                                         |               |               |         |        |
| Raf1 proto-oncogene-encoded protein-serine kinase [S259] (60)                                  |               |               |         |        |
| Raf1 proto-oncogene-encoded protein-serine kinase [S259] (63)                                  |               |               |         |        |
| Retinoblastoma protein [S780]                                                                  |               |               |         |        |
| Retinoblastoma protein [S807-S811]                                                             |               |               |         |        |
| Ribosomal S6 protein-serine kinase 1/3 [T359+S363/T356+S360] (79)                              |               |               |         |        |
| Ribosomal S6 protein-serine kinase 1/3 [T359+S363/T356+S360] (87)                              |               |               |         |        |
| Signal transducer and activator of transcription 1 [Y701] (78)                                 |               |               |         |        |
| Signal transducer and activator of transcription 1 [Y701] (87)                                 |               |               |         |        |
| Signal transducer and activator of transcription 3 [S727]                                      |               |               |         |        |
| Signal transducer and activator of transcription 5 [Y694]                                      |               |               |         |        |
| SMA- and mothers against decapentaplegic homologs 1/5/9 [S463+S465/S463+S465/S465+S467]        |               |               |         |        |
| Src proto-oncogene-encoded protein-tyrosine kinase [Y418] (44)                                 |               |               |         |        |
| Src proto-oncogene-encoded protein-tyrosine kinase [Y418] (46)                                 |               |               |         |        |
| Src proto-oncogene-encoded protein-tyrosine kinase [Y529] (44)                                 |               |               |         |        |
| Src proto-oncogene-encoded protein-tyrosine kinase [Y529] (46)                                 |               |               |         |        |
| Adducin a Lane 3                                                                               | 1308          | 1826          | Control | 40%    |
| Adducin g Lane 3                                                                               | 2225          | 1664          | Control | -25%   |
| B23 (NPM) Lane 19                                                                              | 4047          | 1885          | Control | -53%   |
| CREB1 Lane 20                                                                                  | 1752          | 743           | Control | -58%   |
| CDK1/2 (24) Lane 3                                                                             |               |               |         |        |
| CDK1/2 (27) Lane 3                                                                             | 5216          | 3462          | Control | -34%   |
| PKR (65) Lane 16                                                                               |               |               |         |        |
| PKR (73) Lane 16                                                                               | 214           | 342           | Control | 60%    |
| Erk1 Lane 8                                                                                    |               |               |         |        |
| Erk2 Lane 8                                                                                    | 466           | 1244          | Control | 167%   |
| GSK3a Lane 15                                                                                  | 173           | 302           | Control | 75%    |
| GSK3a (44) Lane 17                                                                             | 2160          | 1493          | Control | -31%   |
| GSK3a (49) Lane 17                                                                             |               |               |         |        |
| GSK3b Lane 15                                                                                  |               |               |         |        |
| GSK3b (34) Lane 17                                                                             | 437           | 788           | Control | 80%    |
| GSK3b (39) Lane 17                                                                             | 2814          | 1078          | Control | -62%   |
| JNK (37) Lane 6                                                                                | 182           | 1035          | Control | 469%   |
| JNK (38) Lane 6                                                                                |               |               |         |        |
| JNK (44) Lane 6                                                                                |               | 441           | Control | Incr   |
| JNK (46) Lane 6                                                                                | 63            | 516           | Control | 719%   |
| Jun (37) Lane 11                                                                               | 738           | 1344          | Control | 82%    |
| Jun (39) Lane 11                                                                               | 3637          | 2369          | Control | -35%   |
| Jun (41) Lane 11                                                                               | 765           | 1000          | Control | 31%    |
| Jun (43) Lane 11                                                                               | 560           | 986           | Control | 76%    |
| MEK3/6 Lane 7                                                                                  |               | 230           | Control | Incr   |
| MEK6 Lane 7                                                                                    |               |               |         |        |
| MEK1/2 Lane 19                                                                                 | 1395          | 254           | Control | -82%   |
| Msk1 (66) Lane 15                                                                              |               |               |         |        |
| Msk1 (74) Lane 15                                                                              |               |               |         |        |
| p38a MAPK (36) Lane 18                                                                         | 374           | 1977          | Control | 429%   |
| p38a MAPK (40) Lane 18                                                                         |               |               |         |        |
| NR1 Lane 2                                                                                     |               |               |         |        |
| S6Ka p70 Lane 8                                                                                |               | 171           | Control | Incr   |
| S6K2 p85 Lane 8                                                                                |               |               |         |        |
| PKBa (Akt1) Lane 14                                                                            | 1592          | 2182          | Control | 37%    |
| PKBa (Akt1) Lane 13                                                                            |               | 300           | Control | Incr   |
| PKCa Lane 5                                                                                    | 4386          | 3794          | Control | -13%   |
| PKCab2 Lane 7                                                                                  | 1014          | 1561          | Control | 54%    |
| PKCd Lane 13                                                                                   |               |               |         |        |
| PKCe Lane 9                                                                                    | 385           | 606           | Control | 57%    |
| Raf1 (60) Lane 12                                                                              |               |               |         |        |
| Raf1 (63) Lane 12                                                                              |               |               |         |        |
| Rb Lane 18                                                                                     | 1194          | 3078          | Control | 158%   |
| Rb Lane 20                                                                                     | 434           | 1402          | Control | 223%   |
| RSK1/3 (79) Lane 6                                                                             | 74            | 273           | Control | 269%   |
| RSK1/3 (87) Lane 6                                                                             |               |               |         |        |
| STAT1 (78) Lane 12                                                                             |               |               |         |        |
| STAT1 (87) Lane 12                                                                             |               |               |         |        |
| STAT3 Lane 10                                                                                  | 232           | 756           | Control | 226%   |
| STAT5 Lane 4                                                                                   |               |               |         |        |
| Smad1/5/8 Lane 9                                                                               | 117           | 127           | Control | 9%     |
| Src (44) Lane 5                                                                                |               |               |         |        |
| Src (46) Lane 5                                                                                |               |               |         |        |
| Src (44) Lane 3                                                                                |               |               |         |        |
| Src (46) Lane 3                                                                                | 201           | 658           | Control | 227%   |

Table S3. Quantitative analysis of multiple Western blots for protein kinases expressed in SNG-M cells, shown in Fig. S7.

|                                                                                           | KS-CTL Norm CPM | KS-GWRQ Norm CPM                 | KS-CTL % | KS-GWRQ % |
|-------------------------------------------------------------------------------------------|-----------------|----------------------------------|----------|-----------|
| 3-phosphoinositide-dependent protein-serine kinase 1                                      |                 |                                  |          |           |
| Aurora Kinase A (serine/threonine protein kinase 6)                                       |                 | PDK1 Lane 6                      |          |           |
| Casein protein-serine kinase 2 alpha/ alpha prime (35)                                    |                 | Aurora A (AIK) Lane 17           | Control  | 14%       |
| Casein protein-serine kinase 2 alpha/ alpha prime (37)                                    |                 | CK2a (35) Lane 20                |          |           |
| Casein protein-serine kinase 2 alpha/ alpha prime (39)                                    |                 | CK2a (37) Lane 20                |          |           |
| Cyclin-dependent protein-serine kinase 1                                                  |                 | CK2a (39) Lane 20                | Control  | -15%      |
| Cyclin-dependent protein-serine kinase 2                                                  |                 | CDK1 (CDK2) Lane 4               | Control  | -5%       |
| Cyclin-dependent protein-serine kinase 4                                                  |                 | CDK2 Lane 6                      | Control  | -28%      |
| Cyclin-dependent protein-serine kinase 5                                                  |                 | CDK4 Lane 5                      | Control  | -41%      |
| Cyclin-dependent protein-serine kinase 6                                                  |                 | CDK5 Lane 3                      |          |           |
| Cyclin-dependent protein-serine kinase 7                                                  |                 | CDK6 Lane 7                      | Control  | -28%      |
| Cyclin-dependent protein-serine kinase 9                                                  |                 | CDK7 Lane 8                      | Control  | -29%      |
| DNA-activated protein-serine kinase                                                       |                 | CDK9 Lane 9                      | Control  | 5%        |
| Double stranded RNA dependent protein-serine kinase                                       |                 | DNAPK Lane 14                    |          |           |
| Elongation factor-2 protein-serine kinase                                                 |                 | PKR1 Lane 17                     | Control  | 43%       |
| Extracellular regulated protein-serine kinase 1 (p44 MAP kinase) (40)                     |                 | eEF2K Lane 16                    | Control  | 15%       |
| Extracellular regulated protein-serine kinase 1 (p44 MAP kinase) (41)                     |                 | Erk1 (40) Lane 4                 |          |           |
|                                                                                           |                 | Erk1 (41) Lane 4                 | Control  | -19%      |
| Extracellular regulated protein-serine kinase 1/2 (p44/p42 MAP kinase) (40/39)            |                 | Erk1/2 (40/39) Lane 4            | Control  | -24%      |
| Extracellular regulated protein-serine kinase 2 (p42 MAP kinase) (37)                     |                 | Erk2 (37) Lane 4                 | Control  | 8%        |
| Extracellular regulated protein-serine kinase 2 (p42 MAP kinase) (37)                     |                 | Erk2 (37) Lane 6                 | Control  | 4%        |
| Extracellular regulated protein-serine kinase 2 (p42 MAP kinase) (39)                     |                 | Erk2 (39) Lane 6                 | Control  | -19%      |
| Extracellular regulated protein-serine kinase 2 (p42 MAP kinase) (39)                     |                 | Erk2 (39) Lane 4                 |          |           |
| Extracellular regulated protein-serine kinase 3 (52)                                      |                 | Erk3 (52) Lane 2                 |          |           |
| Extracellular regulated protein-serine kinase 3 (56)                                      |                 | Erk3 (56) Lane 2                 |          |           |
| Glycogen synthase-serine kinase 3 alpha (44)                                              |                 | GSK3a (44) Lane 18               | Control  | -27%      |
| Glycogen synthase-serine kinase 3 beta (40)                                               |                 | GSK3b (40) Lane 18               | Control  | -8%       |
| Inhibitor of NF-kappa-B protein-serine kinase beta                                        |                 | IKKb Lane 17                     | Control  | 79%       |
| Jun N-terminus protein-serine kinases (stress-activated protein kinase (SAPK)) 1/2/3 (38) |                 | JNK (38) Lane 11                 | Control  | -3%       |
| Jun N-terminus protein-serine kinases (stress-activated protein kinase (SAPK)) 1/2/3 (45) |                 | JNK (45) Lane 11                 | Control  | -24%      |
| MAPK/ERK protein-serine kinase 1 (MKK1)                                                   |                 | MEK1 (MAP2K1) Lane 13            | Control  | -24%      |
| MAPK/ERK protein-serine kinase 2 (MKK2)                                                   |                 | MEK2 (MAP2K2) Lane 14            | Control  | -11%      |
| MAPK/ERK protein-serine kinase 4 (MKK4)                                                   |                 | MEK4 (MAP2K4) Lane 15            |          |           |
| MAPK/ERK protein-serine kinase 6 (MKK6)                                                   |                 | MEK6 (MAP2K6) Lane 16            |          |           |
| Mitogen-activated protein-serine kinase p38 alpha                                         |                 | p38a MAPK Lane 3                 | Control  | -10%      |
| Moloney sarcoma oncogene-encoded protein-serine kinase                                    |                 | Mos Lane 12                      | Control  | -38%      |
| Osaka thyroid oncogene protein-serine kinase (Tip2)                                       |                 | COT Lane 19                      | Control  | -5%       |
| p21-activated kinase 1 (alpha) (serine/threonine-protein kinase PAK 1)                    |                 | PAK1 Lane 14                     | Control  | 30%       |
| p21-activated kinase 3 (beta) (serine/threonine-protein kinase PAK 3)                     |                 | PAK3 Lane 15                     | Control  | 2%        |
| p70 ribosomal protein-serine S6 kinase alpha/beta (59)                                    |                 | S6Ka/b (p70 S6Ka/b) (59) Lane 18 | Control  | 13%       |
| p70 ribosomal protein-serine S6 kinase alpha/beta (61)                                    |                 | S6Ka/b (p70 S6Ka/b) (61) Lane 18 |          |           |
| p70 ribosomal protein-serine S6 kinase alpha/beta (63)                                    |                 | S6Ka/b (p70 S6Ka/b) (63) Lane 18 |          |           |
| Protein-serine kinase B alpha (57)                                                        |                 | PKBa (Akt1) (57) Lane 4          | Control  | 2%        |
| Protein-serine kinase B alpha (60)                                                        |                 | PKBa (Akt1) (60) Lane 4          |          |           |
| Protein-serine kinase C alpha                                                             |                 | PKCa Lane 5                      |          |           |
| Protein-serine kinase C beta 1                                                            |                 | PKCb1 Lane 3                     | Control  | 28%       |
| Protein-serine kinase C delta                                                             |                 | PKCd Lane 10                     | Control  | 176%      |
| Protein-serine kinase C epsilon (91)                                                      |                 | PKCe (91) Lane 8                 | Control  | 29%       |
| Protein-serine kinase C epsilon (96)                                                      |                 | PKCe (96) Lane 8                 |          |           |
| Protein-serine kinase C gamma                                                             |                 | PKCg Lane 7                      |          |           |
| Protein-serine kinase C lambda/ iota                                                      |                 | PKCil Lane 11                    |          |           |
| Protein-serine kinase C mu (Protein kinase D) (110)                                       |                 | PKCm (PKD) (110) Lane 5          | Control  | 18%       |
| Protein-serine kinase C mu (Protein kinase D) (120)                                       |                 | PKCm (PKD) (120) Lane 5          | Control  | 76%       |
| Protein-serine kinase C theta                                                             |                 | PKCt Lane 12                     |          |           |
| Protein-serine kinase C zeta (78)                                                         |                 | PKCz (78) Lane 13                | Control  | 5%        |
| Protein-serine kinase C zeta (83)                                                         |                 | PKCz (83) Lane 13                |          |           |
| RafB proto-oncogene-encoded protein-serine kinase                                         |                 | RafB (Braf) Lane 2               | Control  | 70%       |
| Ribosomal S6 protein-serine kinase 1 (78)                                                 |                 | RSK1 (78) Lane 19                | Control  | 45%       |
| Ribosomal S6 protein-serine kinase 1 (84)                                                 |                 | RSK1 (84) Lane 19                |          |           |
| Ribosomal S6 protein-serine kinase 2 (73)                                                 |                 | RSK2 (73) Lane 20                |          |           |
| Ribosomal S6 protein-serine kinase 2 (78)                                                 |                 | RSK2 (78) Lane 20                |          |           |
